# Supplementary material for: The value of circulating fibrinogen-to-pre-albumin ratio in predicting survival and benefit from chemotherapy in colorectal cancer
Source: PubMed Central journal article supplement — Ther Adv Med Oncol. 2021 Jun 28;13:17588359211022886. doi: 10.1177/17588359211022886 (PMC8243139; doi:10.1177/17588359211022886), 2021-06-28
Supplement: sj-pdf-3-tam-10.1177_17588359211022886.pdf [file sj-pdf-3-tam-10.1177_17588359211022886.pdf]

**Supplementary Table 1 Association of circulating FPR and clinical baseline characteristics in 2917 patients with stage I-IV colorectal cancer.**

| Characteristic    | Subgroup | Stage I CRC |       |                 | Stage II CRC |       |                 | Stage III CRC |       |                 | Stage IV CRC |       |                 |
|-------------------|----------|-------------|-------|-----------------|--------------|-------|-----------------|---------------|-------|-----------------|--------------|-------|-----------------|
|                   |          | H-FPR       | L-FPR | <i>p</i> -value | H-FPR        | L-FPR | <i>p</i> -value | H-FPR         | L-FPR | <i>p</i> -value | H-FPR        | L-FPR | <i>p</i> -value |
| Age               | ≥60      | 78          | 164   |                 | 298          | 276   |                 | 142           | 407   |                 | 218          | 149   |                 |
|                   | <60      | 17          | 9     | 0.001           | 144          | 280   | <0.001          | 124           | 253   | 0.020           | 161          | 197   | <0.001          |
| Sex               | Female   | 37          | 74    |                 | 177          | 205   |                 | 97            | 258   |                 | 176          | 157   |                 |
|                   | Male     | 58          | 99    | 0.543           | 265          | 351   | 0.305           | 169           | 402   | 0.457           | 203          | 189   | 0.774           |
| Smoking           | Yes      | 8           | 27    |                 | 78           | 88    |                 | 50            | 63    |                 | 64           | 61    |                 |
|                   | NO       | 87          | 146   | 0.095           | 364          | 468   | 0.443           | 216           | 597   | <0.001          | 315          | 285   | 0.791           |
| Drinking          | Yes      | 5           | 24    |                 | 55           | 67    |                 | 37            | 52    |                 | 52           | 52    |                 |
|                   | NO       | 90          | 149   | 0.039           | 387          | 489   | 0.851           | 229           | 608   | 0.005           | 327          | 294   | 0.616           |
| Diabetes          | Yes      | 12          | 12    |                 | 42           | 21    |                 | 23            | 45    |                 | 31           | 22    |                 |
|                   | NO       | 83          | 161   | 0.118           | 400          | 535   | <0.001          | 243           | 615   | 0.334           | 348          | 324   | 0.347           |
| Hypertension      | Yes      | 20          | 21    |                 | 78           | 69    |                 | 39            | 83    |                 | 69           | 28    |                 |
|                   | NO       | 75          | 152   | 0.052           | 364          | 487   | 0.020           | 227           | 577   | 0.396           | 310          | 318   | <0.001          |
| pT stage          | T1-2     | 95          | 173   |                 | 0            | 0     |                 | 10            | 74    |                 | 1            | 10    |                 |
|                   | T3-4     | 0           | 0     |                 | 442          | 556   |                 | 256           | 586   |                 | 145          | 155   |                 |
| pN stage          | NA       | -           | -     |                 | -            | -     |                 | -             | -     |                 | 233          | 181   |                 |
|                   | N0       | 0           | 0     |                 | 0            | 0     |                 | 0             | 0     |                 | 41           | 58    |                 |
| Distal metastasis | N1-2     | 0           | 0     |                 | 0            | 0     |                 | 266           | 660   |                 | 102          | 102   |                 |
|                   | NA       | -           | -     |                 | -            | -     |                 | -             | -     |                 | 236          | 186   |                 |
| Differentiation   | No       | 0           | 0     |                 | 0            | 0     |                 | 0             | 0     |                 | 0            | 0     |                 |
|                   | Yes      | 0           | 0     |                 | 0            | 0     |                 | 0             | 0     |                 | 379          | 346   |                 |
| CEA               | G1-2     | 90          | 165   |                 | 413          | 526   |                 | 220           | 589   |                 | 139          | 141   |                 |
|                   | G3-4     | 5           | 8     |                 | 29           | 30    |                 | 46            | 71    |                 | 28           | 21    |                 |
| CA199             | NA       | -           | -     | 0.776           | -            | -     | 0.438           | -             | -     | 0.007           | 212          | 184   |                 |
|                   | low      | 79          | 155   |                 | 295          | 443   |                 | 143           | 418   |                 | 87           | 138   |                 |
| CA199             | High     | 16          | 18    | 0.130           | 147          | 123   | <0.001          | 123           | 242   | 0.007           | 292          | 208   | <0.001          |
|                   | low      | 90          | 167   |                 | 360          | 486   |                 | 175           | 533   |                 | 159          | 183   |                 |
|                   | high     | 5           | 6     | 0.527           | 82           | 70    | 0.009           | 91            | 127   | <0.001          | 220          | 163   | 0.003           |

|            |                  |    |     |       |     |     |        |     |     |        |     |     |        |
|------------|------------------|----|-----|-------|-----|-----|--------|-----|-----|--------|-----|-----|--------|
| Location   | Proximal colon   | 10 | 17  |       | 202 | 256 |        | 102 | 103 |        | 129 | 63  |        |
|            | Left-sided colon | 85 | 156 | 0.856 | 240 | 300 | 0.914  | 164 | 557 | <0.001 | 250 | 283 | <0.001 |
| Recurrence | Yes              | 18 | 17  |       | 141 | 91  |        | 167 | 227 |        | 341 | 224 |        |
|            | No               | 77 | 156 | 0.034 | 301 | 465 | <0.001 | 99  | 443 | <0.001 | 38  | 122 | <0.001 |
| Death      | Yes              | 8  | 4   |       | 97  | 35  |        | 115 | 117 |        | 249 | 147 |        |
|            | No               | 87 | 169 | 0.029 | 345 | 521 | <0.001 | 151 | 543 | <0.001 | 31  | 109 | <0.001 |

**Abbreviation:** CRC: colorectal cancer; FPR: fibrinogen-to-pre-albumin ratio; NA: not variable; H- and L-FPR within stage I patient: FPR $\geq$ 14.6 and FPR<14.6 within stage I CRC patient; H- and L-FPR within stage I patient: FPR $\geq$ 14.6 and FPR<14.6 within stage I CRC patient; H- and L-FPR within stage II patient: FPR $\geq$ 16.5 and FPR<16.5 within stage II CRC patient; H- and L-FPR within stage I patient: FPR $\geq$ 19.5 and FPR<19.5 within stage III CRC patient; H- and L-FPR within stage IV patient: FPR $\geq$ 22.8 and FPR<22.8 within stage I CRC patient.
